# Supplementary material for: Distinct Responsiveness of Tumor-Associated Macrophages to Immunotherapy of Tumors with Different Mechanisms of Major Histocompatibility Complex Class I Downregulation
Source: MDPI journal article supplement (doi:10.3390/cancers13123057), 2021-06-19
Supplement: s1 [file s1]

Supplementary Materials

# Distinct Responsiveness of Tumor-Associated Macrophages to Immunotherapy of Tumors with Different Mechanisms of Major Histocompatibility Complex Class I Downregulation

Adrianna Piatakova, Ingrid Polakova, Jana Smahelova, Shweta Dilip Johari, Jaroslav Nunvar and Michal Smahel

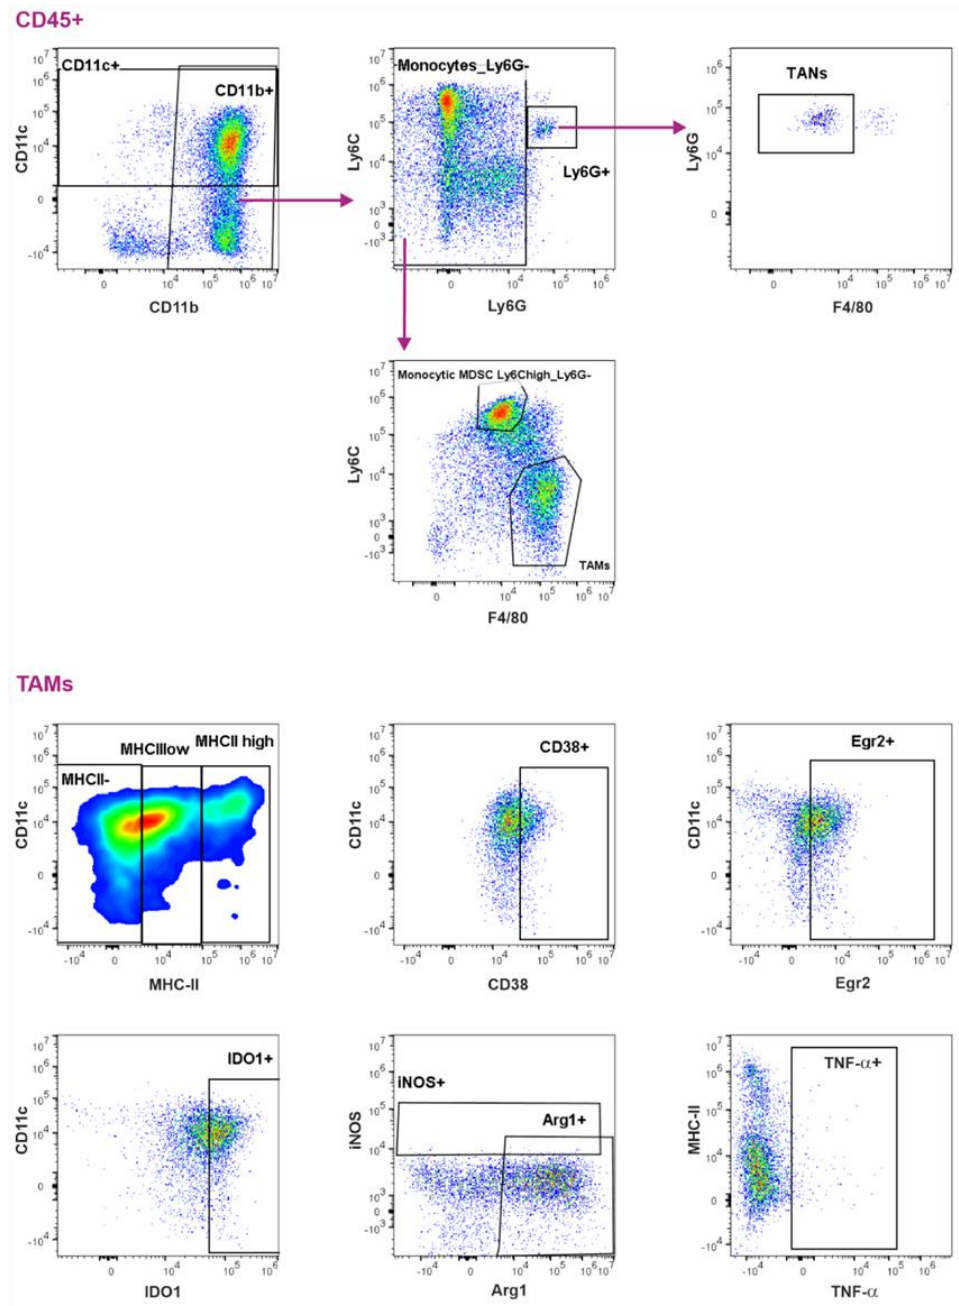

**Figure S1.** Gating strategy for flow cytometry analysis of Figure 2. Myeloid cells, originating from treated and non-treated tumors (see Figure 2), were identified with flow cytometry analysis, as described in Materials and Methods. The initial gates determined single cells (FSC-A vs. FSC-W) and live cells. The gate on FSC-A vs. SSC-A selected the cells from the tumor, which were divided into CD45<sup>-</sup> and CD45<sup>+</sup> cells. Populations downstream from CD45<sup>+</sup> cells are indicated in the above figure. CD11b, Ly6G, Ly6C and F4/80 markers defined TANs and TAMs. Subpopulations of TAMs expressing MHC-II and the CD38 and Egr2 macrophage markers are also depicted in the figure, followed by subpopulations expressing the amino acid degrading enzymes IDO1, iNOS, and Arg1, and the cytokine TNF- $\alpha$ . The accurate identification of some subpopulations required FMO controls.

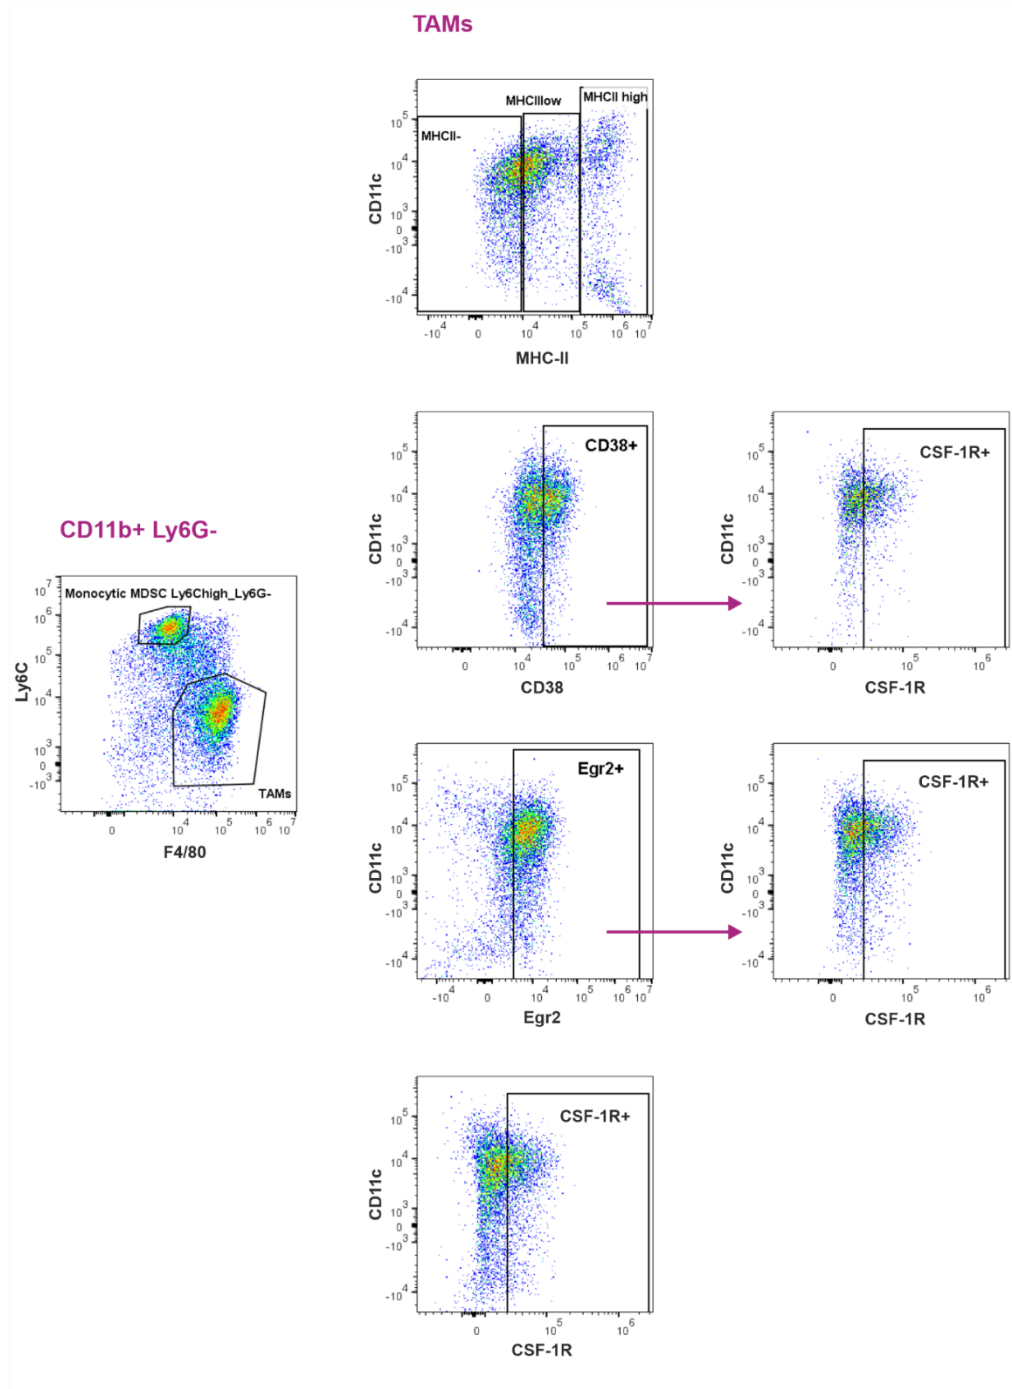

**Figure S2.** Gating strategy for flow cytometry analysis of Figure 7. TAMs originated from tumors described in Figure 7 were identified using different flow cytometry panel of antibodies, but the same upstream gating hierarchy as delineated in Figure S1. Aside from MHC-II, CD38 and Egr2 macrophage markers, CSF-1R was gated. The arrows indicate CSF-1R-expression on CD38<sup>+</sup> and Egr2<sup>+</sup> TAMs. FMO controls were used, if needed.

A

TC-1/A9 D2 vs. TC-1 D2

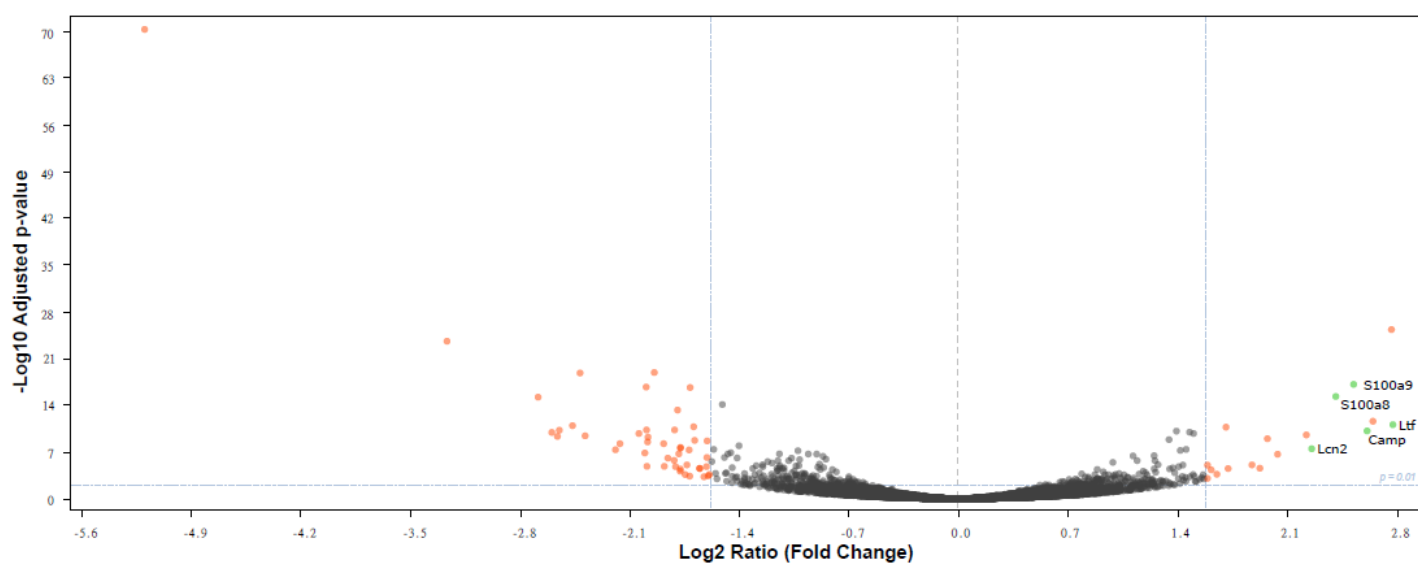

B

TC-1/dB2m naïve vs. TC-1 naïve

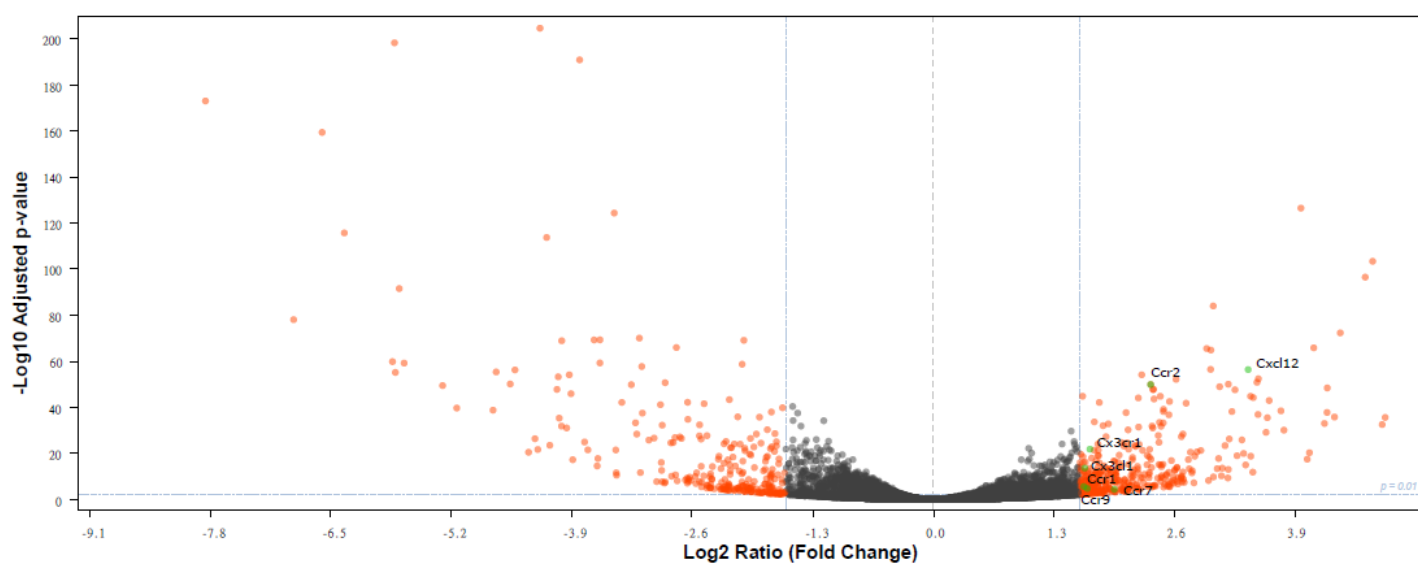

**Figure S3:** Differential gene expression. (A) Comparison of TC-1/A9 tumors with TC-1 tumors 2 days after IT. Upregulated genes associated with neutrophil activation and degranulation are indicated. (B) Comparison of naïve TC-1/dB2m tumors with TC-1 tumors. Upregulated genes encoding chemokines and their receptors are indicated.



**Table S1.** Immune-related genes ( $n=173$ )

| Antigen presentation | Cytokine | Cytokine receptor | Cytotoxicity | Chemokine | Chemokine receptor | Immunoinhibitor | Immunostimulator |
|----------------------|----------|-------------------|--------------|-----------|--------------------|-----------------|------------------|
| Cd1d1                | Csf1     | Csf1r             | Gzma         | Ccl11     | Ackr1              | Adora2a         | Cd27             |
| Cd74                 | Ifng     | Csf2ra            | Gzmb         | Ccl12     | Ackr3              | Arg1            | Cd28             |
| Cd83                 | Il10     | Csf2rb            | Gzmc         | Ccl2      | Ccr1               | Btla            | Cd40             |
| Icam1                | Il11     | Csf2rb2           | Gzmd         | Ccl21a    | Ccr2               | Cd274           | Cd48             |
| Mr1                  | Il12b    | Csf3r             | Gzme         | Ccl21b    | Ccr5               | Cd276           | Cd80             |
| Nod1                 | Il15     | Ifnar1            | Gzmf         | Ccl21c    | Ccr7               | Ctla4           | Cd86             |
| Nod2                 | Il16     | Ifnar2            | Gzmg         | Ccl25     | Ccr9               | Ido1            | Entpd1           |
| Psmb8                | Il17d    | Ifngr1            | Gzmm         | Ccl27a    | Ccr12              | Lgals9          | Icos             |
| Psmb9                | Il18     | Ifngr2            | Prf1         | Ccl3      | Cmk1r1             | Pdcd1           | Klrk1            |
| Psmb9                | Il1b     | Ifnlr1            |              | Ccl4      | Cx3cr1             | Pdcd1lg2        | Nt5e             |
| Relb                 | Il27     | Il10ra            |              | Ccl5      | Cxcr2              | Slamf7          | Pvr              |
| Slc11a1              | Il33     | Il10rb            |              | Ccl6      | Cxcr3              | Tigit           | Raet1e           |
| Tap1                 | Il34     | Il11ra1           |              | Ccl7      | Cxcr4              | Vegfa           | Tmem173          |
| Tap2                 | Il6      | Il11ra2           |              | Ccl8      | Cxcr5              | Vegfb           | Ulbp1            |
| Tapbp                | Il7      | Il12rb1           |              | Ccl9      | Cxcr6              | Vsir            |                  |
|                      | Spp1     | Il12rb2           |              | Cx3cl1    | Xcr1               | Vtcn1           |                  |
|                      | Tgfa     | Il13ra1           |              | Cxcl10    |                    |                 |                  |
|                      | Tgfb1    | Il13ra2           |              | Cxcl12    |                    |                 |                  |
|                      | Tgfb2    | Il15ra            |              | Cxcl14    |                    |                 |                  |
|                      | Tgfb3    | Il17ra            |              | Cxcl16    |                    |                 |                  |
|                      | Tnfsf13  | Il17rc            |              | Cxcl2     |                    |                 |                  |
|                      | Tnfsf13b | Il17rd            |              | Cxcl5     |                    |                 |                  |
|                      | Tnfsf14  | Il18r1            |              | Cxcl9     |                    |                 |                  |
|                      | Tnfsf15  | Il18rap           |              | Xcl1      |                    |                 |                  |
|                      | Tnfsf9   | Il1r1             |              |           |                    |                 |                  |
|                      | S100a8   | Il1r2             |              |           |                    |                 |                  |
|                      | S100a9   | Il1rap            |              |           |                    |                 |                  |
|                      |          | Il1rapl1          |              |           |                    |                 |                  |
|                      |          | Il1rapl2          |              |           |                    |                 |                  |
|                      |          | Il1rl1            |              |           |                    |                 |                  |
|                      |          | Il1rl2            |              |           |                    |                 |                  |
|                      |          | Il1rn             |              |           |                    |                 |                  |
|                      |          | Il20ra            |              |           |                    |                 |                  |
|                      |          | Il20rb            |              |           |                    |                 |                  |
|                      |          | Il21r             |              |           |                    |                 |                  |
|                      |          | Il27ra            |              |           |                    |                 |                  |
|                      |          | Il2ra             |              |           |                    |                 |                  |
|                      |          | Il2rb             |              |           |                    |                 |                  |
|                      |          | Il2rg             |              |           |                    |                 |                  |
|                      |          | Il31ra            |              |           |                    |                 |                  |
|                      |          | Il3ra             |              |           |                    |                 |                  |
|                      |          | Il4ra             |              |           |                    |                 |                  |
|                      |          | Il6ra             |              |           |                    |                 |                  |
|                      |          | Il7r              |              |           |                    |                 |                  |
|                      |          | Tgfbr1            |              |           |                    |                 |                  |
|                      |          | Tgfbr2            |              |           |                    |                 |                  |
|                      |          | Tgfbr3            |              |           |                    |                 |                  |
|                      |          | Tgfbrap1          |              |           |                    |                 |                  |
|                      |          | Tnfrsf13b         |              |           |                    |                 |                  |
|                      |          | Tnfrsf18          |              |           |                    |                 |                  |
|                      |          | Tnfrsf4           |              |           |                    |                 |                  |
|                      |          | Tnfrsf9           |              |           |                    |                 |                  |
